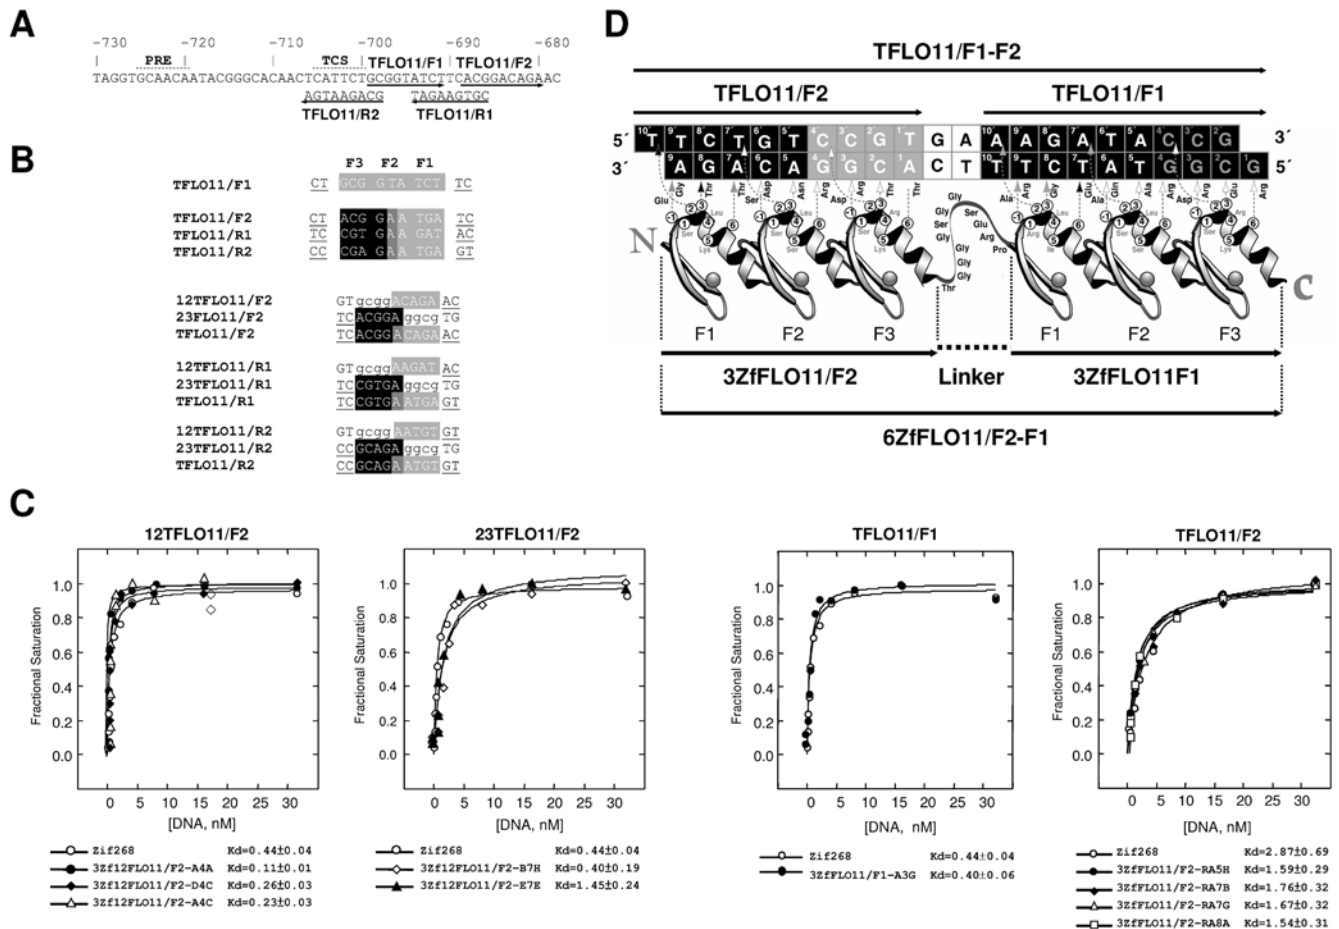

**Figure 1. Binding of ZF domains to the *FLO11* gene of budding yeast *S. cerevisiae*.** (A) 5'UTR sequences of *FLO11* used in identification of sequence-specific 3-finger DNA-binding motifs. Nucleotides are numbered relative to the translational start site. The 9-bp core sequences of the target sites TFLO11/F1, TFLO11/F2, TFLO11/R1 and TFLO11/R2 are shown with arrows indicating the direction of the sequence from 5' to 3'. Sequences of Ste12 (PRE), and Tec1 (TCS) binding sites are shown above. (B) DNA oligos used in the phage selection, including 2-bp flanking sequences on each side. The shaded areas represent the core bound sequences. Individual fingers bind triplet nucleotides, indicated by F1, F2, and F3, respectively. For direct selection of TFLO11/F1 from Lib12, the oligo CTGCGGTATCTTC is shown shaded light grey. Targets of TFLO11/F2, TFLO11/R1, and TFLO11/R2 were subjected to bipartite selection: targets were divided into two "half sites" that comprise a gcgg anchor (in lower case) and a 5-bp target (shaded grey or black). The targets were selected from two complementary libraries, Lib12 and Lib23, and recombined to bind a full 9 bp sequence, made from the two grey and black half-targets. The sequences flanking the core target sequences are underlined. (C) The apparent  $K_d$ s of the individual clones bound to the respective 12TFLO11/F2 and 23TFLO11/F2 "half sites", as well as the individual clones of TFLO11/F1 or TFLO11/F2 "full sites". (D) Corresponding amino acid residues of 3ZFLO11/F1 and 3ZFLO11/F2 and their proposed mode of contact with DNA targets. The amino acids are shown with circles numbered relative to their helical positions. Due to a cross-strand interaction of amino acid 2 of finger 1, each of the 3F domains potentially binds to an extra base, making a 10-bp DNA site. The linker peptide between the two 3F domains is Thr-Gly-Gly-Gly-Gly-Ser-Gly-Gly-Ser-Glu-Arg-Pro. The amino acid residues with proposed contacts to DNA bases are shown with arrows. The shaded dotted arrows indicate that the contact is either stereochemically unfavorable (in black), favorable (in white), or neutral (in gray) according to "recognition-code" rules [43,44]. doi:10.1371/journal.pone.0000746.g001

terminus of ZFs, including nuclear localization signal and AD, did not change the binding affinity of the proteins tested. In addition, the binding affinity of the rTF with a 6F DBD was approximately 10-fold stronger to those of the rTFs with 3Fs (Figure 2). This is modest when compared with most of the previous observations that 6F proteins increase affinity for DNA from 20- to 6,000-fold, relative to 3F proteins [14,15,49]. Nonetheless, we decided to compare the relative functioning of these constructs *in vivo*.

### The induction of *FLO11* mRNA depends on the presence of recombinant transcription factors in *S. cerevisiae*

To generate constructs capable of expressing functional rTFs in *S. cerevisiae*, the coding sequences of rTFs from pV16-rTFs and

pVP64-rTFs were PCR amplified and cloned into pCM185 such that the expression of rTFs is tetracycline-repressible. The resulting six pCM185-rTF constructs allow expressing the rTFs of VP16-3ZFLO11/F1, VP64-3ZFLO11/F1, VP16-3ZFLO11/F2, VP64-3ZFLO11/F2, VP16-6ZFLO11/F1-F2, and VP64-6ZFLO11/F1-F2. These pCM185-rTFs constructs were introduced into wild type haploid yeast strain W303. To assess the expression of rTFs in yeast cells, the transformants with individual constructs were grown exponentially in selective medium, in non-induced conditions, followed by growing in either induced or non-induced conditions for various times. Samples were taken to measure the levels of rTFs expression by Western Blot analysis. The levels of rTFs began to accumulate after 3 hrs and reached a maximum within 12 hrs of induction (data not shown), consistent with the observed kinetics of induction in the system

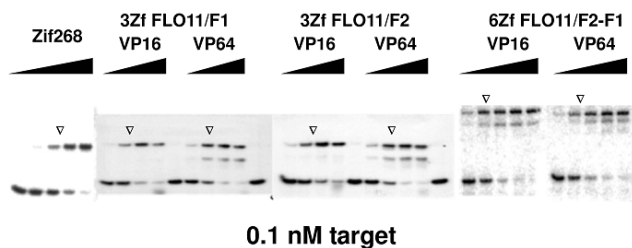

**Figure 2. Zinc finger rTFs expressed from the pcDNA3.1(-)-based constructs retain their binding affinity when expressed as fusions with VP16 or VP64 activation domains, NLS and epitope tag.** Gel-shift assays were carried out using the full target DNA site TFLO11/F2-F1, with rTFs produced from an *in vitro* transcription-translation system, using a 5-fold dilution series of protein. The binding of Zif268 with its cognate site (left) was used as a reference to determine the relative binding affinity of rTFs and TFLO11/F2-F1. To estimate K<sub>d</sub> values, it was assumed that protein expression in each TNT reaction, and each subsequent dilution, was the same. Triangles indicate the concentration of rTFs where half the amount of target DNA bound with rTFs. doi:10.1371/journal.pone.0000746.g002

[50]. By contrast, no detectable rTFs were observed when cells were grown in non-induced conditions, as compared with those in induced conditions (Figure 3A). This regulatable mode of transcription control therefore provides a useful way to determine

the dependency of gene expression by tailor-made rTFs targeting specific sequences of genes.

To test the dependency of the *FLO11* expression on rTFs, yeast cells carrying constructs of pCM185-rTFs were cultured exponentially in selective medium with glucose, in non-induced conditions. Samples were subsequently grown in induced or non-induced conditions for various times, and then the levels of *FLO11* mRNA examined by Northern Blot analysis. As shown in Figure 3B and C, while the *FLO11* mRNA only stayed at the basal level in cells carrying control pCM185, *FLO11* mRNA accumulated in cells expressing rTFs. This occurred in a time-dependent manner with the maximal level after 24 hrs of induction. Interestingly, such induction was particularly apparent in cells expressing rTFs with 3ZfFLO11/F2, although the induction could also be seen in cells expressing rTFs with 6ZfFLO11/F2-F1. Unexpectedly, the level of *FLO11* mRNA in cells expressing rTFs with 3ZfFLO11/F1 was similar to that in cells with the control, suggesting that this domain was not functioning *in vivo*.

It seemed that rTFs with VP64 activate the expression of *FLO11* better than those with VP16 (Fig. 3B, C). However, differences in activation between VP16 and VP64 were observed as being rather limited (data not shown). The potency of transcriptional activation between VP16 and VP64 is therefore by and large the same. These results indicated that the expression of *FLO11* mRNA was mediated by the induction of rTFs targeting the 5'UTR of *FLO11*

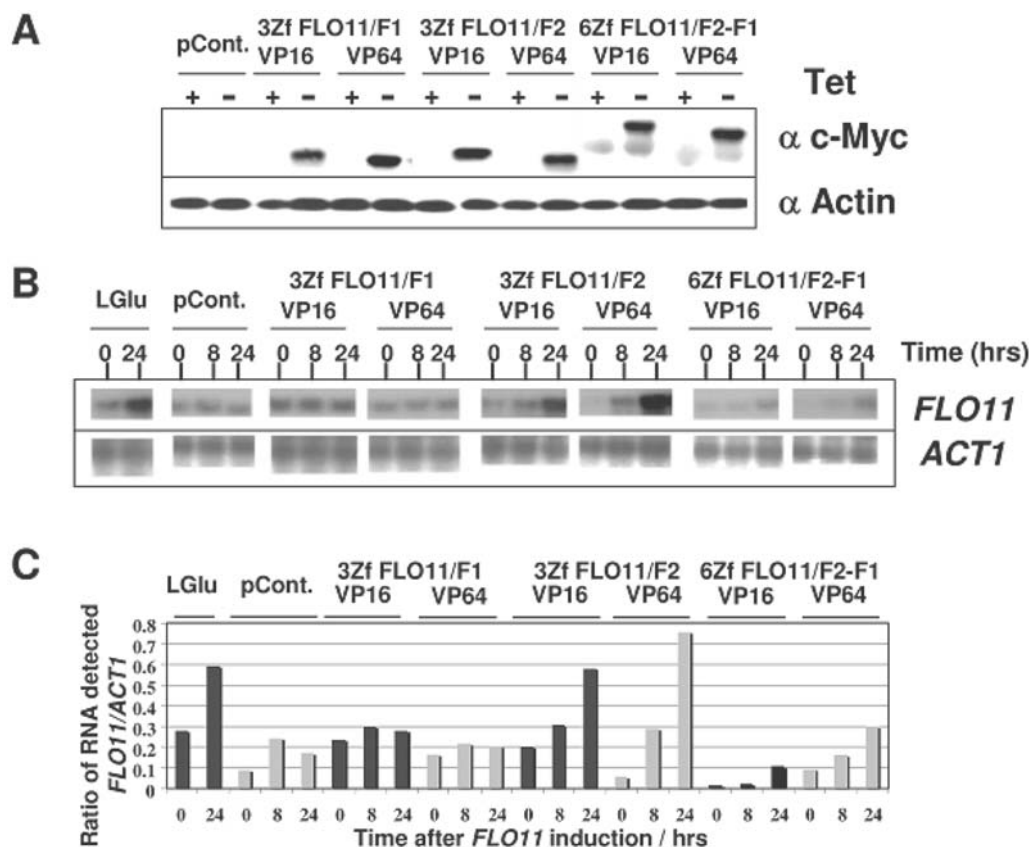

**Figure 3. Zinc finger rTFs activate the expression of the *FLO11* gene in budding yeast.** (A) DNAs capable of encoding rTFs were constructed into pCM185, a tetracycline-repressible yeast vector. Cells expressing rTFs, as indicated, were grown either in the presence or absence of 1  $\mu$ g/ml tetracycline for 12 hrs, after which the cells were collected for Western blotting to detect the expression of rTFs. (B) The same cells were grown in the absence of tetracycline (inducing conditions) and collected at the times indicated, for Northern blotting to detect *FLO11*. The empty plasmid pCM185, designated as pCont., was used as a negative control. Cells with pCM185 growing in the absence of tetracycline and 0.05% glucose, indicated as LGlu, instead of 2% glucose were used to examine the expression of *FLO11* under derepressed conditions (C) The northern blots were quantitated using ImageQuant v1.2 and the ratios of induced *FLO11*, relative to *ACT1* control RNA, are plotted as a histogram. doi:10.1371/journal.pone.0000746.g003











45. Sadowski I, Ma J, Triezenberg S, Ptashne M (1988) GAL4-VP16 is an unusually potent transcriptional activator. *Nature* 335: 563–564.
46. Seipel K, Georgiev O, Schaffner W (1992) Different activation domains stimulate transcription from remote ('enhancer') and proximal ('promoter') positions. *Embo J* 11: 4961–4968.
47. Beerli RR, Dreier B, Barbas CF 3rd (2000) Positive and negative regulation of endogenous genes by designed transcription factors. *Proc Natl Acad Sci U S A* 97: 1495–1500.
48. Moore M, Klug A, Choo Y (2001) Improved DNA binding specificity from polyzinc finger peptides by using strings of two-finger units. *Proc Natl Acad Sci U S A* 98: 1437–1441.
49. Moore M, Choo Y, Klug A (2001) Design of polyzinc finger peptides with structured linkers. *Proc Natl Acad Sci U S A* 98: 1432–1436.
50. Gari E, Piedrafita L, Aldea M, Herrero E (1997) A set of vectors with a tetracycline-regulatable promoter system for modulated gene expression in *Saccharomyces cerevisiae*. *Yeast* 13: 837–848.
51. O'Toole GA, Pratt LA, Watnick PI, Newman DK, Weaver VB, et al. (1999) Genetic approaches to study of biofilms. *Methods Enzymol* 310: 91–109.
52. Reynolds TB, Fink GR (2001) Bakers' yeast, a model for fungal biofilm formation. *Science* 291: 878–881.
53. Beerli RR, Segal DJ, Dreier B, Barbas CF 3rd (1998) Toward controlling gene expression at will: specific regulation of the *erbB-2/HER-2* promoter by using polydactyl zinc finger proteins constructed from modular building blocks. *Proc Natl Acad Sci U S A* 95: 14628–14633.
54. Kohler T, Wesche S, Taheri N, Braus GH, Mosch HU (2002) Dual role of the *Saccharomyces cerevisiae* TEA/ATTS family transcription factor Tec1p in regulation of gene expression and cellular development. *Eukaryot Cell* 1: 673–686.
55. Chou S, Huang L, Liu H (2004) Fus3-regulated Tec1 degradation through SCFCdc4 determines MAPK signaling specificity during mating in yeast. *Cell* 119: 981–990.
56. Blancafort P, Chen EI, Gonzalez B, Bergquist S, Zijlstra A, et al. (2005) Genetic reprogramming of tumor cells by zinc finger transcription factors. *Proc Natl Acad Sci U S A* 102: 11716–11721.
57. Bae KH, Kwon YD, Shin HC, Hwang MS, Ryu EH, et al. (2003) Human zinc fingers as building blocks in the construction of artificial transcription factors. *Nat Biotechnol* 21: 275–280.
58. Madhani HD, Fink GR (1997) Combinatorial control required for the specificity of yeast MAPK signaling. *Science* 275: 1314–1317.
59. Choo Y, Klug A (1994) Toward a code for the interactions of zinc fingers with DNA: selection of randomized fingers displayed on phage. *Proc Natl Acad Sci U S A* 91: 11163–11167.
60. Choo Y, Klug A (1994) Selection of DNA binding sites for zinc fingers using rationally randomized DNA reveals coded interactions. *Proc Natl Acad Sci U S A* 91: 11168–11172.
61. Kalderon D, Roberts BL, Richardson WD, Smith AE (1984) A short amino acid sequence able to specify nuclear location. *Cell* 39: 499–509.
62. Evan GI, Lewis GK, Ramsay G, Bishop JM (1985) Isolation of monoclonal antibodies specific for human c-myc proto-oncogene product. *Mol Cell Biol* 5: 3610–3616.
63. Schiestl RH, Gietz RD (1989) High efficiency transformation of intact yeast cells using single stranded nucleic acids as a carrier. *Curr Genet* 16: 339–346.
64. Millar JB, Buck V, Wilkinson MG (1995) Pyp1 and Pyp2 PTPases dephosphorylate an osmosensing MAP kinase controlling cell size at division in fission yeast. *Genes Dev* 9: 2117–2130.
65. Johnston LH, White JH, Johnson AL, Lucchini G, Plevani P (1987) The yeast DNA polymerase I transcript is regulated in both the mitotic cell cycle and in meiosis and is also induced after DNA damage. *Nucleic Acids Res* 15: 5017–5030.
